# Supplementary material
Source: Springer Nature journal article supplement (https://www.springermedizin.de/resource/supplementary/12879_2011_1933_MOESM1_ESM.pdf/9443284)
Supplement: MOESM1 [file 9443284]

**APPENDIX: Search terms varicella complications**

| <b>APPENDIX A: Search terms for varicella-related complications and symptoms</b> |               |                                                                                                           |
|----------------------------------------------------------------------------------|---------------|-----------------------------------------------------------------------------------------------------------|
|                                                                                  | ICPC code     | Free text (synonyms, medical or lay names with or without grammatical mistakes of the following wordings) |
| <b>Upper respiratory tract, ENT and eye complications</b>                        |               |                                                                                                           |
| Conjunctivitis                                                                   | F70           | Conjunctivitis; inflammation of the eye                                                                   |
| Otitis media                                                                     | H71/H72       | Otitis media (OME or OMA); middle ear infection/inflammation                                              |
| Upper respiratory tract infection                                                | R74           | Upper respiratory tract infections (URTI or URI)                                                          |
| Lymphadenitis                                                                    | B70/B71       | Lymphadenitis; inflammation/infection of the lymph node                                                   |
| Tonsillitis                                                                      | R76           | Tonsillitis; inflammation/infection of the tonsils; angina                                                |
| Pharyngitis                                                                      | R74.02        | Pharyngitis; inflammation/infection of the throat or pharynx                                              |
| <b>Lower respiratory tract complications</b>                                     |               |                                                                                                           |
| Pneumonia                                                                        | R81           | Pneumonia; infection/inflammation of the lung                                                             |
| Bronchitis                                                                       | R78           | Bronchitis                                                                                                |
| <b>Skin infectious/cutaneous complications</b>                                   |               |                                                                                                           |
| Phlegmon                                                                         |               | Phlegmon; flegmon; infection with streptococci of soft tissue                                             |
| Pyoderma                                                                         | S76           | Pyoderma (gangrenosum) (PG); pus in the skin                                                              |
| Abscess                                                                          | S10 / D95.2   | Abscess; Furuncle                                                                                         |
| Skin infection                                                                   | S11           | Skin infection; (secondary) inflammation/infection of the skin                                            |
| Cellulitis                                                                       | S10.3         | Cellulitis; bacterial infection of the deeper layers of the skin                                          |
| Scar Tissue                                                                      |               | Scar Tissue                                                                                               |
| Impetigo                                                                         | S84           | Impet(igo) ( <i>in Dutch krentenbaard</i> )                                                               |
| <b>Neurologic complications</b>                                                  |               |                                                                                                           |
| Syncope                                                                          | A06           | Syncope; collapse; loss of consciousness                                                                  |
| Neuralgia                                                                        | N92           | Neuralgia; pain in a nerve pathway                                                                        |
| Meningitis                                                                       | N71.01/N71.02 | Meningitis; inflammation of the meninges ( <i>in Dutch nekkramp</i> )                                     |
| Encephalitis                                                                     | N71.03        | Encephalitis; acute inflammation of the brain                                                             |
| Convulsion                                                                       | N07           | Convulsion; seizure( <i>in Dutch (koorts)stuipen</i> )                                                    |
| Ataxia (Cerebellitis)                                                            | N29           | Ataxia; dysfunction of the cerebellum                                                                     |
| Movement and stability dysfunction (others than ataxia)                          | N06           | Movement and stability dysfunction                                                                        |
| Vertigo                                                                          | N17           | Vertigo; dizziness                                                                                        |
| Facial Palsy                                                                     | N91           | Facial(is) paresis/palsy                                                                                  |
| Coma                                                                             | A07           | Coma; unconsciousness                                                                                     |
| Reye's syndrome                                                                  |               | Reye's syndrome                                                                                           |
| <b>Gastrointestinal tract complications</b>                                      |               |                                                                                                           |
| Stomatitis                                                                       | D83           | Stomatitis; viral infection of the mouth                                                                  |
| Gastroenteritis                                                                  | D73           | Gastroenteritis (GE); gastric flu; inflammation of the gastrointestinal tract                             |
| Pancreatitis                                                                     | D99.04        | Pancreatitis; inflammation of the pancreas                                                                |
| Appendicitis                                                                     | D88           | Appendicitis; inflammation of the appendix                                                                |
| <b>Haematological complications and coagulation disorders</b>                    |               |                                                                                                           |
| Thrombocytopenia                                                                 | B83.02        | Thrombocytopenia; reduced platelet (thrombocyte)                                                          |
| Haemorrhage                                                                      | A10           | Haemorrhage; bleeding; loss of blood                                                                      |
| Coagulation                                                                      | B83           | Coagulation: formation of a blood clot (problems)                                                         |
| <b>Complications due to (systemic) bacterial infections</b>                      |               |                                                                                                           |
| Sepsis                                                                           | W70           | Sepsis; Blood Infection                                                                                   |
| Osteomyelitis                                                                    | L70.01        | Osteomyelitis; inflammation of the bone                                                                   |
| Pyogen arthritis                                                                 | L70.02        | (pyogen) arthritis; arthritis caused by <i>Streptococcus pyogenes</i>                                     |
| Necrotizing fasciitis                                                            |               | Necrotizing fasciitis; infection of soft tissue                                                           |
| <b>Death</b>                                                                     |               |                                                                                                           |
| Death                                                                            | A96           | Death; deceased                                                                                           |
| <b>Symptoms</b>                                                                  |               |                                                                                                           |
| Mouth blisters                                                                   | D83.02        | Mouth blister ( <i>in Dutch aften</i> )                                                                   |
| Coughing                                                                         | R05           | Cough; sputum                                                                                             |
| Snivelling                                                                       | A15           | Snivelling; whining                                                                                       |
| Fever                                                                            | A03           | Fever; pyrexia; temperature rises                                                                         |
| Fatigue                                                                          | A04           | Fatigue; exhaustion; listlessness                                                                         |
| Problems Sleeping                                                                |               | Problems with sleeping                                                                                    |
| Emesis/Vomiting                                                                  | D10           | Emesis; Vomiting                                                                                          |
| Problems Eating/drinking                                                         | T03/T04       | Problems Eating; Problems drinking; feeding problems                                                      |
| Pruritis                                                                         | S02           | Pruritis; Itching                                                                                         |
| Exanthema                                                                        | S06/S07       | Skin rash; exanthema; exanthem                                                                            |
| Headache                                                                         | N01           | Headache; pain or discomfort in the head, scalp or neck                                                   |
| Dehydration/Diarrhea                                                             | D11/ D70/ T11 | Dehydration; Diarrhea; loss of body fluids                                                                |
